# Supplementary material
Source: publisher figshare collection journal article supplement (https://sage.figshare.com/ndownloader/files/16250645)
Supplement: Supplementary file 1 [file 16250645]

Online Supplementary Appendix 2

Table1: Full results of Figure 1

| **Year** | **Modularity scores by coalition**  **(weighted)** | | |  |  |  |
| --- | --- | --- | --- | --- | --- | --- |
| **All** | **Not successful** | **Successful** | **CI 95 Low** | **CI 95 High** | **Simulations**  **Mean** |
| **2006** | 0.33 | 0.33 | 0.24 | 0.21 | 0.4 | 0.32 |
| **2007** | 0.36 | 0.38 | 0.22 | 0.26 | 0.42 | 0.35 |
| **2008** | 0.34 | 0.35 | 0.20 | 0.22 | 0.4 | 0.32 |
| **2009** | 0.28 | 0.28 | 0.27 | 0.06 | 0.4 | 0.25 |
| **2010** | 0.30 | 0.31 | 0.18 | 0.22 | 0.36 | 0.29 |
| **2011** | 0.30 | 0.31 | 0.17 | 0.22 | 0.35 | 0.29 |
| **2012** | 0.26 | 0.28 | 0.09 | 0.18 | 0.32 | 0.26 |
| **2013** | 0.26 | 0.27 | 0.14 | 0.15 | 0.34 | 0.25 |
| **2014** | 0.30 | 0.32 | 0.06 | 0.21 | 0.36 | 0.29 |
| **2015** | 0.33 | 0.35 | 0.12 | 0.23 | 0.39 | 0.32 |
| **2016** | 0.29 | 0.30 |  |  |  |  |
| **2017** | 0.35 | 0.35 |  |  |  |  |

Table 2: Number of detected communities and associated modularity scores

| Year | **Modularity scores** | | | **Number of communities** | | |
| --- | --- | --- | --- | --- | --- | --- |
| **All** | **Not successful** | **Successful** | **All** | **Not successful** | **Successful** |
| 2006 | 0.47 | 0.47 | 0.37 | 3 | 3 | 7 |
| 2007 | 0.44 | 0.46 | 0.37 | 4 | 5 | 6 |
| 2008 | 0.40 | 0.41 | 0.39 | 4 | 4 | 6 |
| 2009 | 0.32 | 0.33 | 0.58 | 3 | 3 | 6 |
| 2010 | 0.40 | 0.42 | 0.31 | 3 | 3 | 7 |
| 2011 | 0.41 | 0.43 | 0.31 | 3 | 3 | 5 |
| 2012 | 0.37 | 0.40 | 0.31 | 3 | 3 | 5 |
| 2013 | 0.35 | 0.37 | 0.30 | 3 | 3 | 7 |
| 2014 | 0.35 | 0.38 | 0.28 | 3 | 3 | 7 |
| 2015 | 0.37 | 0.40 | 0.29 | 3 | 3 | 5 |
| 2016 | 0.33 | 0.36 |  | 3 | 4 |  |
| 2017 | 0.46 | 0.46 |  | 3 | 3 |  |
